# Supplementary material for: Linking a Gene Cluster to Atranorin, a Major Cortical Substance of Lichens, through Genetic Dereplication and Heterologous Expression
Source: PubMed Central journal article supplement (PMC8262933; doi:10.1128/mbio.01111-21), 2021-06-22
Supplement: mbio.01111-21-sf001.pdf [file mbio.01111-21-sf001.pdf]

**1. Depsides**, derived from orsellinic acid

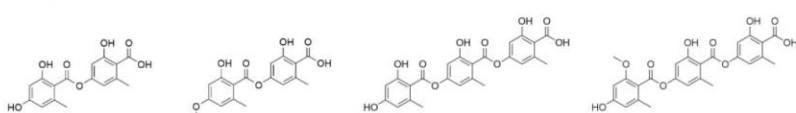

lecanoric acid

evernic acid

gyrophoric acid

umbilicic acid

**2. Depsides (alkyl-substituted)**, derived from orsellinic acid

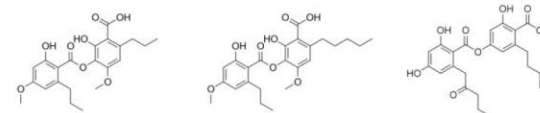

sekikaic acid  
(meta)

homosekikaic acid  
(meta)

olivetoric acid

**3. Depsidones (alkyl-substituted)**, derived from orsellinic acid

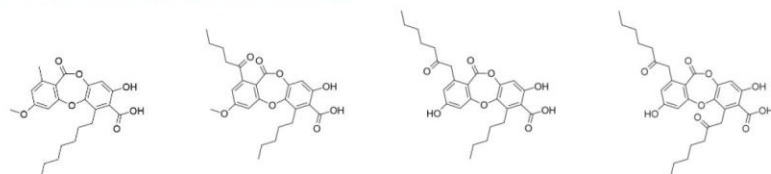

grayanic acid

lobaric acid

physodic acid

aletronic acid

**4. Depsides (related to atranorin)**, derived from 3MOA

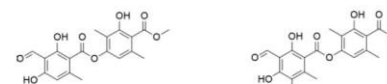

atranorin

chloroatranorin

**5. Depsides (related to barbatic acid)**, derived from 3MOA

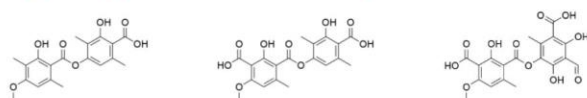

barbatic acid

squamatic acid

thamnolic acid  
(meta)

**7. Dibenzofurans**

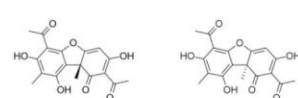

(+)-usnic acid

(-)-usnic acid

**8. Dibenzofurans (alkyl-substituted)**

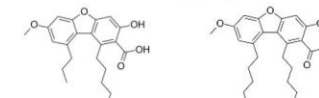

didymic acid

condidymic acid

**6. Depsidones**, derived from 3MOA

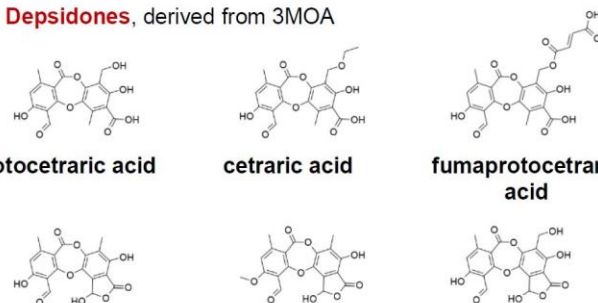

protocetraric acid

cetraric acid

fumaprotocetraric  
acid

norstictic acid

stictic acid

salazinic acid

**9. Anthraquinones**

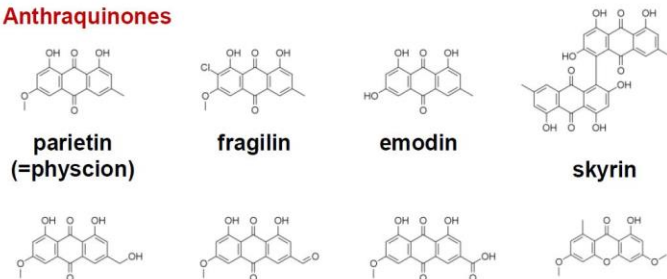

parietin  
(=phycion)

fragilin

emodin

skyrin

fallacinol  
(=teloschistin)

fallacinal

parietinic  
acid

lichexanthone

**Fig. S1. Chemical structures of cortical and medullary substances of lichens.** Lichen substances reported in the 30 genome-sequenced species are grouped by nine chemical groups, based on the chemical structures (Also, see Table S1). 3MOA, 3-methylorsellinic acid.
