# Supplementary material for: Linking a Gene Cluster to Atranorin, a Major Cortical Substance of Lichens, through Genetic Dereplication and Heterologous Expression
Source: PubMed Central journal article supplement (PMC8262933; doi:10.1128/mbio.01111-21), 2021-06-22
Supplement: mbio.01111-21-sf002.pdf [file mbio.01111-21-sf002.pdf]

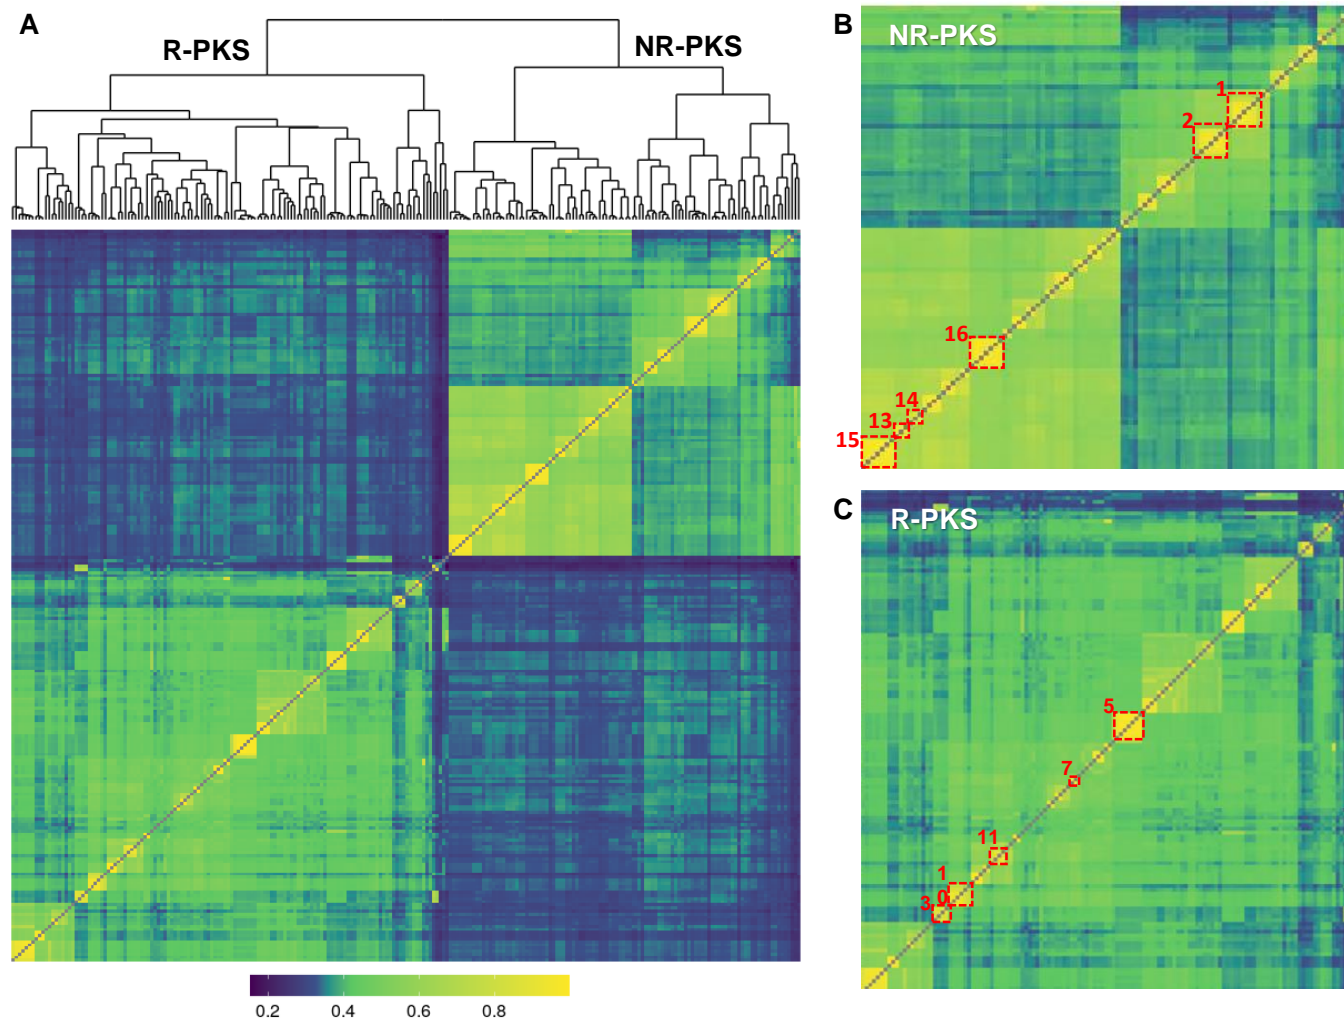

**Fig. S2. Overview of the similarity of PKS families.** (A) All versus all comparison of ketosynthase domain of 238 PKSs in the six *Cladonia* spp. and *S. alpinum* identifies clusters of PKSs (yellow squares). Enlarged views of clusters of NR-PKS (B) and R-PKS (C). Red boxes and associated numbers indicate PKS family identified by Timsina *et al.* 2014.
