# Supplementary material for: Linking a Gene Cluster to Atranorin, a Major Cortical Substance of Lichens, through Genetic Dereplication and Heterologous Expression
Source: PubMed Central journal article supplement (PMC8262933; doi:10.1128/mbio.01111-21), 2021-06-22
Supplement: mbio.01111-21-sf004.pdf [file mbio.01111-21-sf004.pdf]

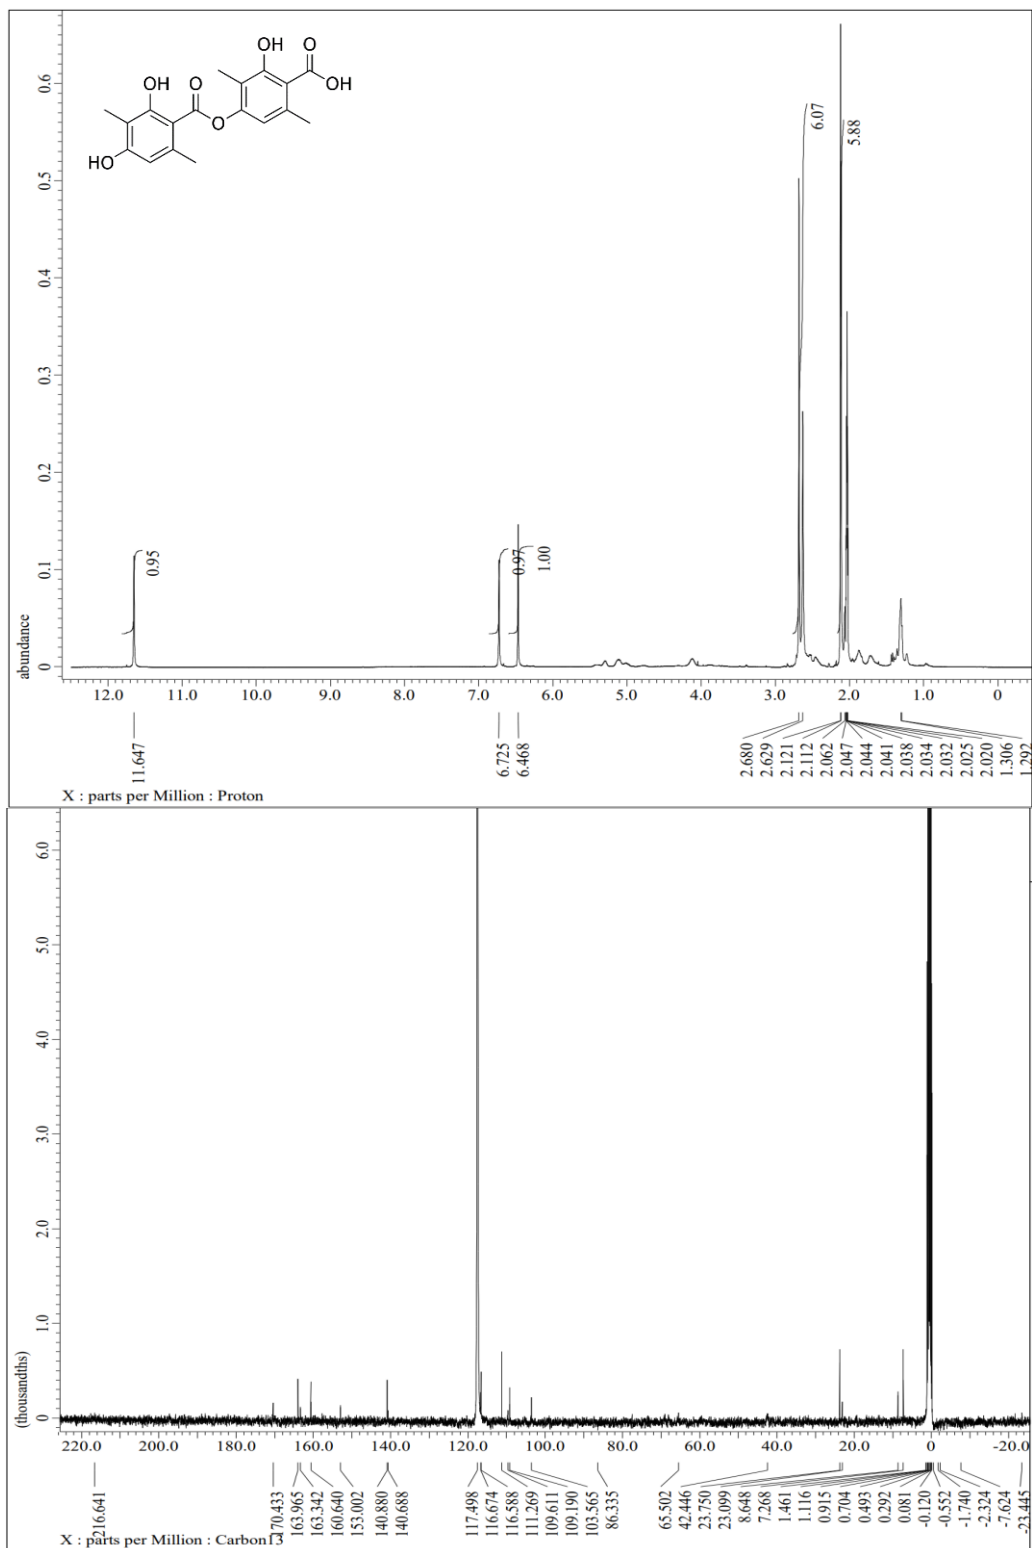

**Fig. S4A.** NMR analysis for 4-*O*-demethylbarbatic acid. <sup>1</sup>H-NMR (400 MHz; upper panel) and <sup>13</sup>C-NMR (100 MHz; lower panel) spectra of **1** in CD<sub>3</sub>COCD<sub>3</sub>.

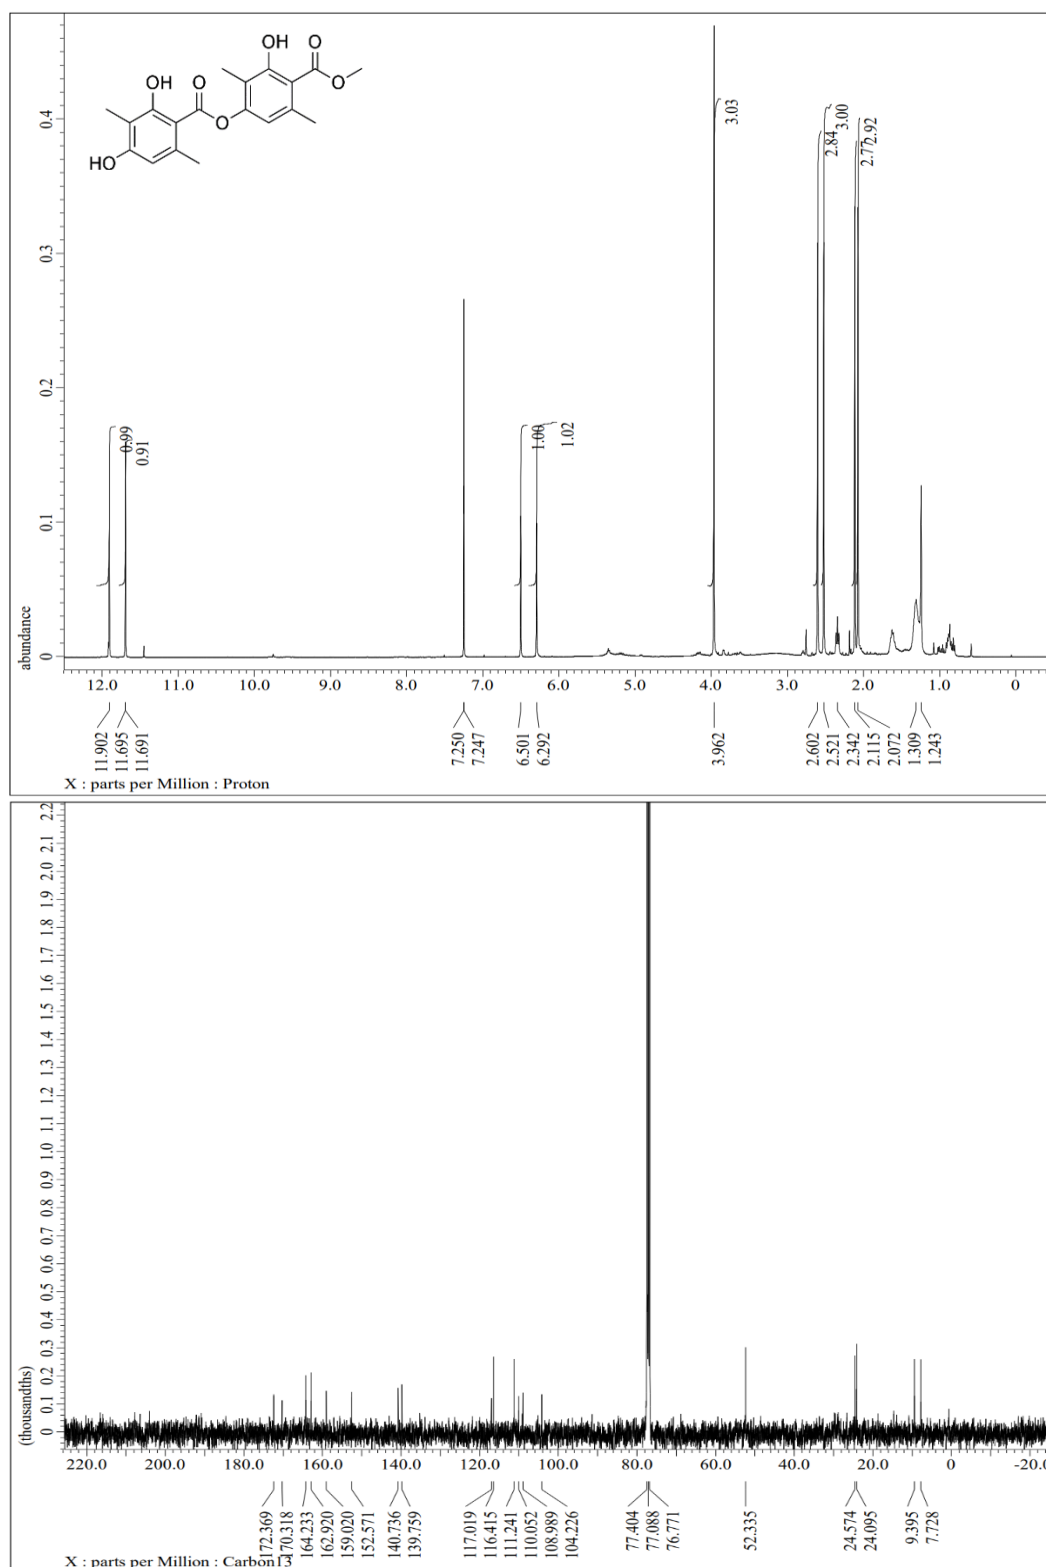

**Fig. S4B.** NMR analysis for proatranorin I. <sup>1</sup>H-NMR (400 MHz; upper panel) and <sup>13</sup>C-NMR (100 MHz; lower panel) spectra of **2** in CDCl<sub>3</sub>.

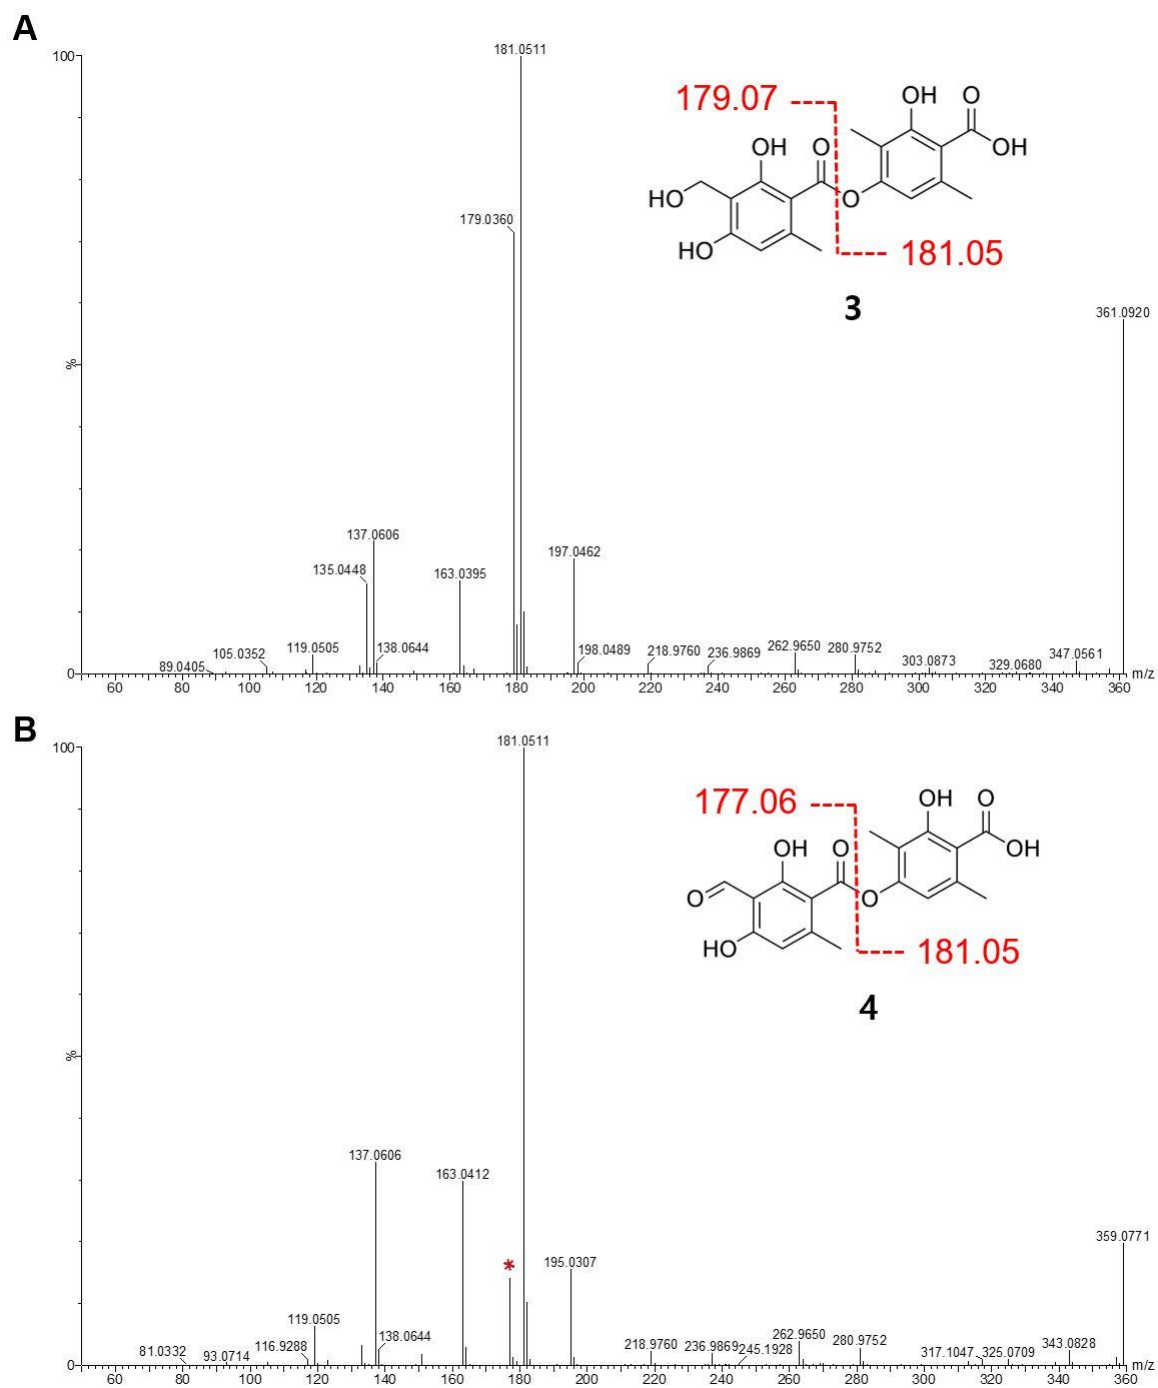

**Fig. S4C. LC–MS/MS analysis for proatranorins II and III.** The upper MS/MS spectrum indicates a fragmentation mechanism of compound 3. The lower MS/MS spectrum indicates a fragmentation mechanism of compound 4. Red asterisk indicates a peak corresponding to  $m/z$  177.06.

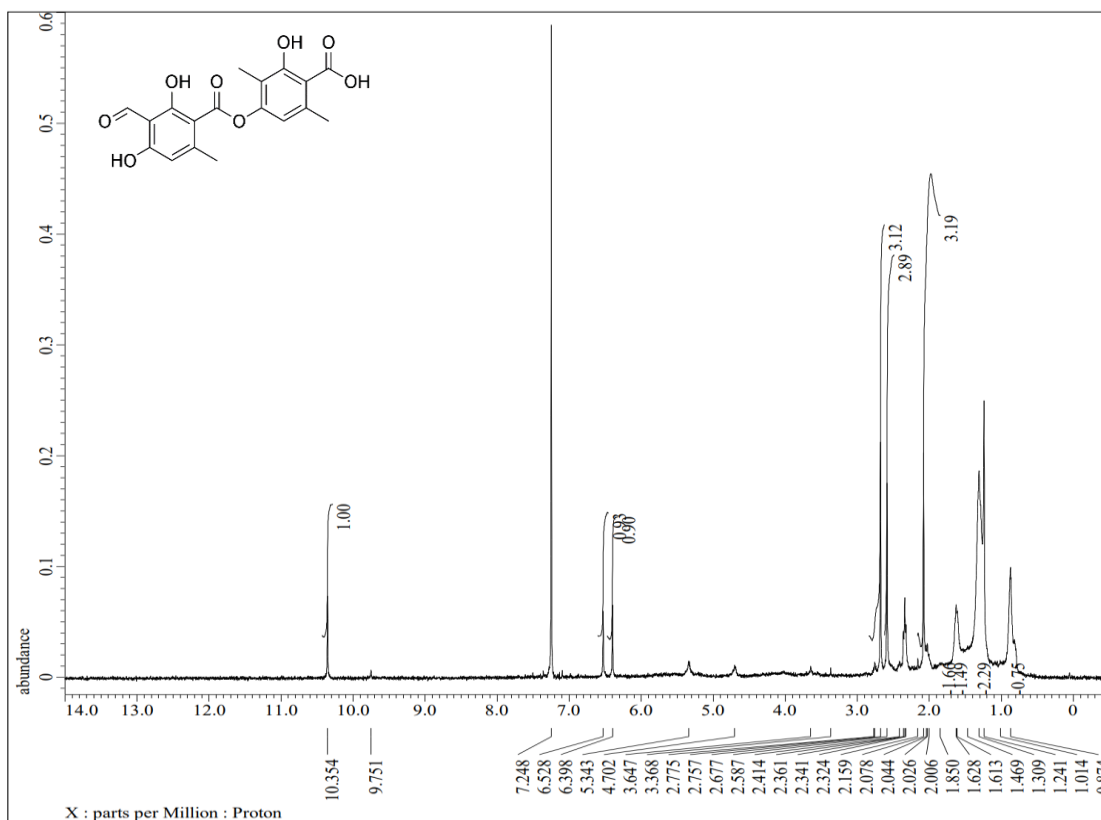

**Fig. S4D. NMR analysis for proatranorin III.** <sup>1</sup>H-NMR (400 MHz) spectrum of **4** in CDCl<sub>3</sub>.

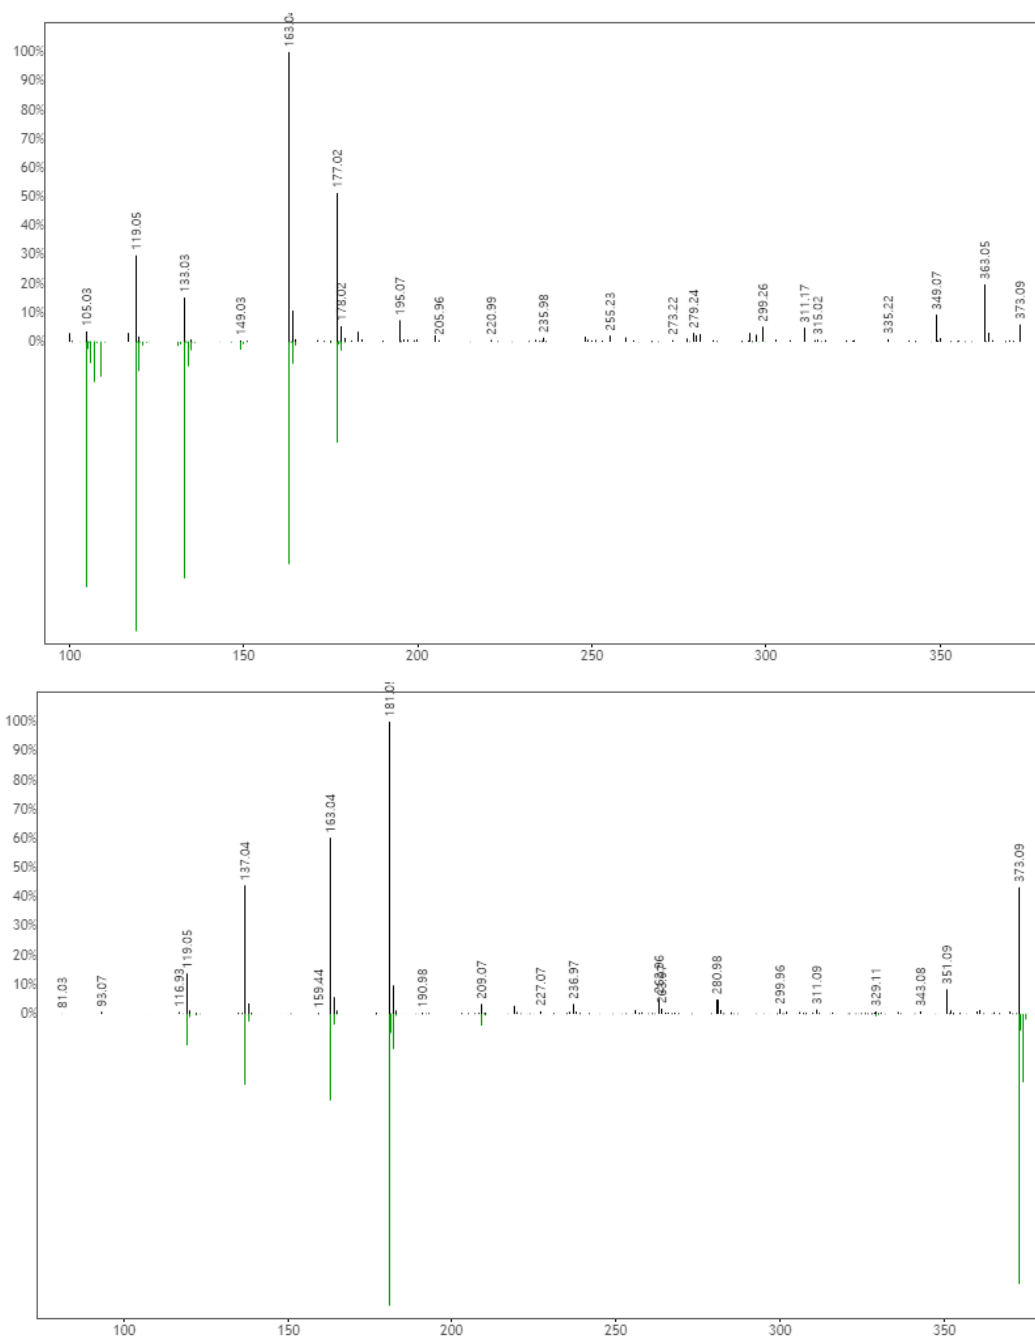

**Fig. S4E. MS/MS spectral matching.** The upper panel shows MS/MS spectrum of compound **5** observed in a strain expressing the *atr1*, *atr2* and *atr3* (black) and the reference spectrum of atranorin (green) in the Lichen Database (green). The lower panel shows MS/MS spectrum of compound **6** (black) and the reference spectrum of baemycesic acid (green).
