# Supplementary material for: Linking a Gene Cluster to Atranorin, a Major Cortical Substance of Lichens, through Genetic Dereplication and Heterologous Expression
Source: PubMed Central journal article supplement (PMC8262933; doi:10.1128/mbio.01111-21), 2021-06-22
Supplement: mbio.01111-21-sf005.pdf [file mbio.01111-21-sf005.pdf]

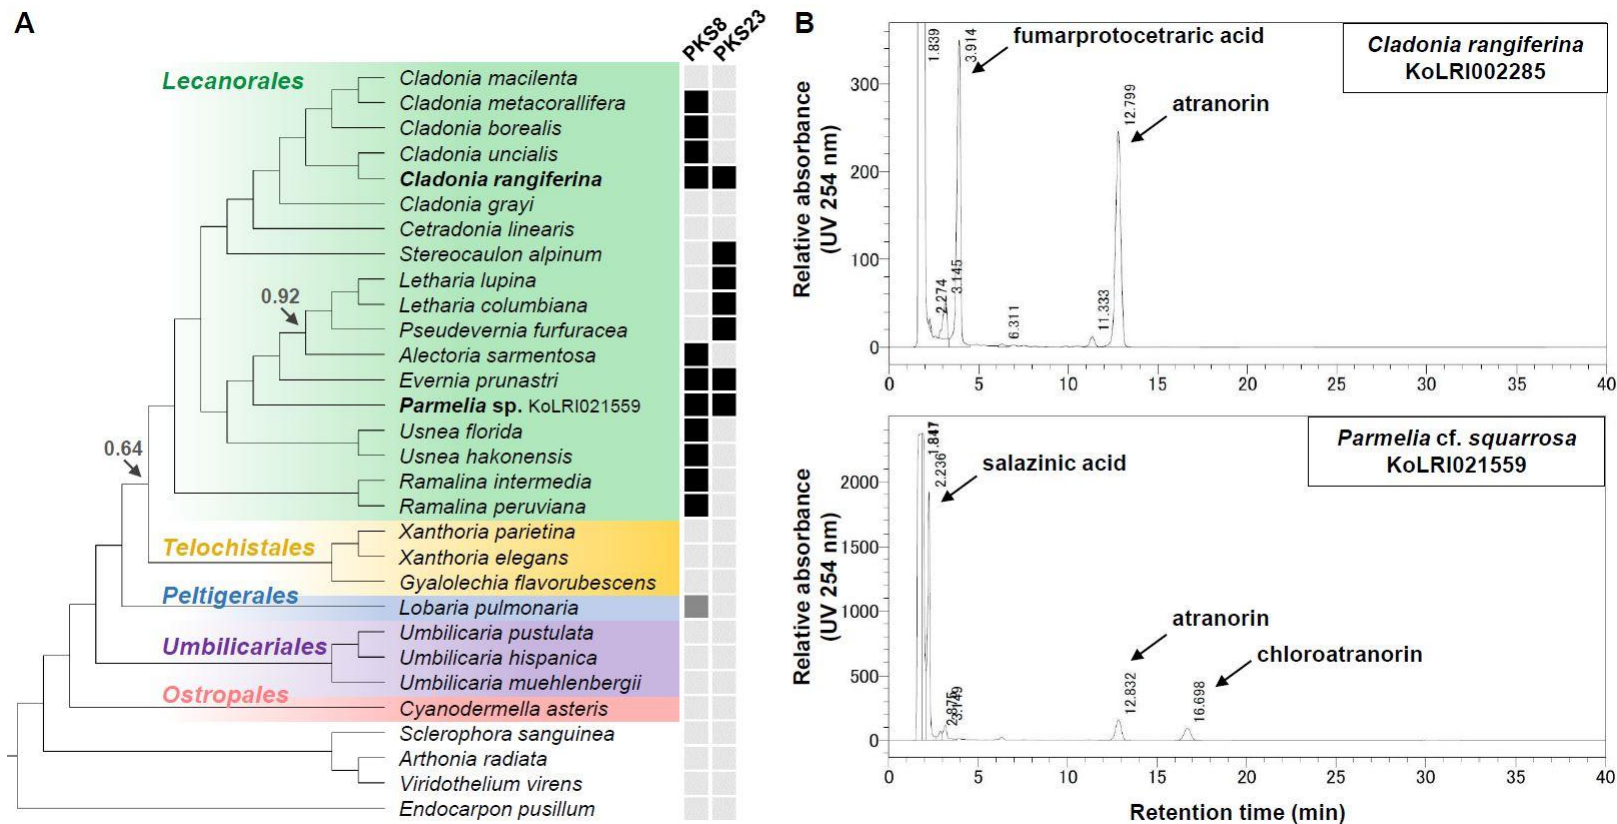

**Figs. S5A and S5B. Lichens with atranorin and usnic acid BGCs (A)** Phyletic distribution of PKS8 family (*aka.* MPAS) and PKS23 (Atr1) family that is responsible for biosynthesis of usnic acid and atranorin, respectively. Black squares indicate the presence of indicated PKS families, and a grey square for *Lobaria pulmonaria* indicates a partial PKS8 gene. Note that *Cladonia rangiferina*, *Evernia prunastri*, and *Parmelia sp.* KoLRI021559 possess both PKS8 and PKS23 BGCs. **(B)** HPLC profiles of acetone extracts of *C. rangiferina* (upper panel) and *Parmelia sp.* KoLRI021559 (lower panel). Lichen substances are identified by comparison their retention time and UV spectra to the lichen substance database. Note that *C. rangiferina* and *Parmelia sp.* produce atranorin as a cortical substance and a 3MOA-derived depsidone as a medullary substance (fumarprotocetraric acid for *C. rangiferina*; salazinic acid for *Parmelia sp.*), lacking usnic acid.

**C**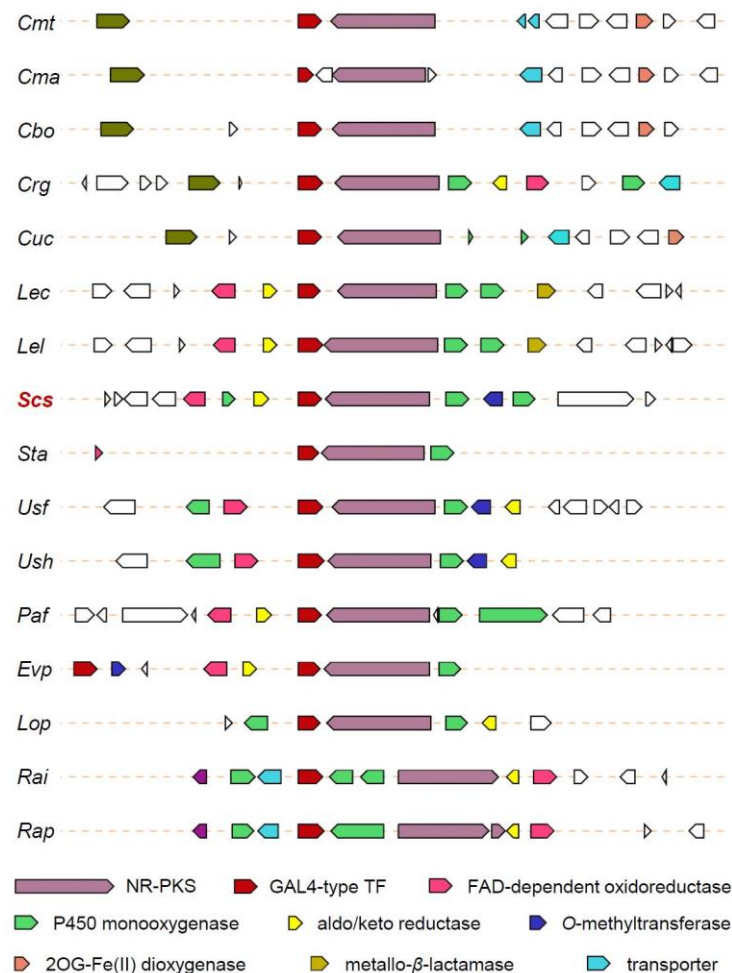

**Fig. S5C. Detection of conserved PKS1 BGCs in lichens.** Sixteen BGCs including a PKS1 homolog are identified from 1,527 BGCs detected in the 30 genomes, using the CORASON analysis pipeline. A GAL4-type transcription factor and the PKS1 BGC in *C. rangiferina* (*Crg*) are used as the query gene and as the query gene cluster, respectively. Lichen species with a homologous PKS1 BGC are labelled with their abbreviated names, as in Figure 1. Note that *Sclerophora sanguinea* (*Scs*, labelled in red) that belongs to Coniocybomycetes possesses a homologous PKS1 BGC. Genes related to secondary metabolism are color-coded, based on their predicted function. NR-PKS, non-reducing type I PKS; TF, transcription factor.

D

|                           | NR-PKS groups |    |     |    |   |    |     |      |    |    | Sum |
|---------------------------|---------------|----|-----|----|---|----|-----|------|----|----|-----|
|                           | I             | II | III | IV | V | VI | VII | VIII | IX | NC |     |
| <i>C. borealis</i>        | 1             | 4  | 1   | 3  | 2 | 4  | 1   | 2    | 2  | 1  | 21  |
| <i>C. grayi</i>           | 3             | 3  | 0   | 1  | 0 | 0  | 0   | 0    | 2  | 1  | 10  |
| <i>C. macilenta</i>       | 2             | 3  | 2   | 3  | 2 | 2  | 1   | 2    | 2  | 0  | 19  |
| <i>C. metacorallifera</i> | 2             | 3  | 1   | 3  | 1 | 2  | 1   | 2    | 2  | 0  | 17  |
| <i>C. rangiferina</i>     | 3             | 3  | 1   | 1  | 1 | 1  | 0   | 1    | 3  | 1  | 15  |
| <i>C. uncialis</i>        | 1             | 3  | 1   | 0  | 2 | 2  | 1   | 2    | 2  | 2  | 16  |
| <i>S. alpinum</i>         | 2             | 1  | 0   | 0  | 0 | 1  | 0   | 1    | 3  | 0  | 8   |
| <i>A. fumigatus</i>       | 0             | 0  | 1   | 0  | 3 | 1  | 1   | 1    | 0  | 0  | 7   |
| <i>A. nidulans</i>        | 1             | 0  | 1   | 1  | 3 | 3  | 6   | 0    | 0  | 0  | 15  |
| <i>A. niger</i>           | 0             | 1  | 1   | 0  | 2 | 1  | 3   | 0    | 0  | 1  | 9   |
| <i>A. terreus</i>         | 0             | 1  | 0   | 1  | 1 | 2  | 3   | 0    | 0  | 0  | 8   |

**Fig. S5D. NR-PKS diversity in *Cladonia* and *Aspergillus* species.** NR-PKSs in the six *Cladonia* spp., *Stereocaulon alpinum* and four *Aspergillus* spp. are categorized by the nine phylogenetic groups (Groups I–IX). The information on NR-PKSs in the four *Aspergillus* spp. are retrieved from Romsdahl and Wang 2019. The PKS16 family is considered to belong to the Group I, although the PKS16 formed a monophyletic clade sister to the Group I (also see Fig. 5). NC, not categorized.
